# Supplementary material for: The amount of calcifications in pseudoxanthoma elasticum patients is underestimated in computed tomographic imaging; a post-mortem correlation of histological and computed tomographic findings in two cases
Source: PubMed Central journal article supplement (PMC6108976; doi:10.1007/s13244-018-0621-6), 2018-06-01
Supplement: 13244_2018_621_MOESM1_ESM.pdf [file 13244_2018_621_MOESM1_ESM.pdf]

# Online Supplement

This data supplement has been provided by the authors to give the readers additional information about their work.

Supplement to: Vos A, Kranenburg G, De Jong PA, Mali WPTM, Van Hecke W, Bleys RLAW, Isgum I, Vink A, Spiering W. The amount of calcifications in pseudoxanthoma elasticum patients is underestimated in computer tomographic imaging; a post-mortem correlation of histological and computed tomographic findings in two cases.

Table of contents:

| Content                                               | Page |
|-------------------------------------------------------|------|
| Supplemental table I: List of examined tissue samples | 2    |

**Supplemental table 1** List of examined tissue samples

| Organs  | Case 1                          | Case 2                          |
|---------|---------------------------------|---------------------------------|
| Skin    | Macroscopically affected skin   | Macroscopically affected skin   |
|         | Macroscopically unaffected skin | Macroscopically unaffected skin |
| Heart   | Ventricular myocardium          | Ventricular myocardium          |
|         | Atrial myocardium               |                                 |
|         | Atrioventricular node           | Atrioventricular node           |
|         | Pericardium                     |                                 |
| Vessels | Abdominal aorta                 | Abdominal aorta                 |
|         | Thoracic aorta                  | Thoracic aorta                  |
|         | Common carotid artery           | Common carotid artery           |
|         | Coronary artery                 | Coronary artery                 |
|         | Celiac trunk                    | Celiac trunk                    |
|         | Splenic artery                  | Splenic artery                  |
|         | Superior mesenteric artery      | Superior mesenteric artery      |
|         | Renal artery                    | Renal artery                    |
|         |                                 | Inferior mesenteric artery      |
|         |                                 | Common iliac artery             |
|         |                                 | Internal iliac artery           |
|         | External iliac artery           | External iliac artery           |
|         | Femoral artery                  | Superficial femoral artery      |
|         | Anterior tibial artery          | Anterior tibial artery          |

|                        |                                                                                    |                                                                                                                                                                                   |
|------------------------|------------------------------------------------------------------------------------|-----------------------------------------------------------------------------------------------------------------------------------------------------------------------------------|
|                        | Intracranial internal carotid artery<br><br>Vertebral artery<br><br>Basilar artery | Intracranial internal carotid artery<br><br>Anterior cerebral artery<br><br>Medial cerebral artery<br><br>Posterior cerebral artery<br><br>Vertebral artery<br><br>Basilar artery |
| Digestive system       | Esophagus<br><br>Stomach<br><br>Liver                                              | Esophagus<br><br>Stomach<br><br>Liver<br><br>Pancreas                                                                                                                             |
| Respiratory system     | Lungs with pleura<br><br>Trachea                                                   | Lungs with pleura                                                                                                                                                                 |
| Genitourinary system   | Bladder<br><br>Kidney                                                              | Testicle<br><br>Prostate<br><br>Bladder<br><br>Kidney                                                                                                                             |
| Hematopoietic system   | Spleen<br><br>Bone marrow<br><br>Lymph node                                        | Spleen<br><br>Bone marrow<br><br>Lymph node                                                                                                                                       |
| Endocrine system       | Adrenal<br><br>Thyroid                                                             | Adrenal<br><br>Thyroid                                                                                                                                                            |
| Central nervous system | Spinal cord<br><br>Cerebral cortex                                                 | Cerebral cortex                                                                                                                                                                   |

|  |                                                         |                                                         |
|--|---------------------------------------------------------|---------------------------------------------------------|
|  | Cerebellum<br>Basal nuclei<br>Hippocampus<br>Brain stem | Cerebellum<br>Basal nuclei<br>Hippocampus<br>Brain stem |
|--|---------------------------------------------------------|---------------------------------------------------------|
